# Supplementary material for: An innovative biotransformation to produce resveratrol by Bacillus safensis
Source: PubMed Central journal article supplement — RSC Adv. 2019 May 17;9(27):15448–56. doi: 10.1039/c9ra01338e (PMC9064255; doi:10.1039/c9ra01338e), 2019-05-17
Supplement: RA-009-C9RA01338E-s001.pdf [file RA-009-C9RA01338E-s001.pdf]

**Table S1** Primers used in this study

| Primers name    | Primers sequence                         | Recognition sites |
|-----------------|------------------------------------------|-------------------|
| <i>bgl</i> -1-F | CGGGATCCTTGTCAAACAAAGAACGGTTTTT          | <i>Bam</i> H I    |
| <i>bgl</i> -1-R | ATAAGAATGCGGCCGCTTAGTTGATCAGACGATGGTATTC | <i>Not</i> I      |
| A               |                                          |                   |
| <i>bgl</i> -2-F | CGGGATCCATGGTCAAAGAAAGAAGCTTTCTT         | <i>Bam</i> H I    |
| <i>bgl</i> -2-R | ATAAGAATGCGGCCGCCTATCCTCCTTGAGGCAGGAT    | <i>Not</i> I      |
| <i>bgl</i> -3-F | GGAATCCATATGATGAAAAAGTTGGCTCAAAGAGT      | <i>Nde</i> I      |
| <i>bgl</i> -3-R | CGGGATCCTCATCGGTTCTTTTCATTCATT           | <i>Bam</i> H I    |
| <i>bgl</i> -4-F | CGGGATCCTTATTCGTCTGTTTCCTCATAGC          | <i>Bam</i> H I    |
| <i>bgl</i> -4-R | ATAAGAATGCGGCCGCTTAATGAAGATTACCAATCCAGTG | <i>Not</i> I      |
| C               |                                          |                   |
| <i>bgl</i> -5-F | CGGAATCCTTAAAAACCGTTATTCTTTGAAAC         | <i>Eco</i> R I    |
| <i>bgl</i> -5-R | CCCAAGCTTTTAATGTCGATGGAAACTAACAAGC       | <i>Hind</i> III   |

**Table S2.** universal citric acid–disodium hydrogen phosphate buffers

| pH  | 0.2 mol/L Na <sub>2</sub> HPO <sub>4</sub> (mL) | 0.1 mol/L C <sub>6</sub> H <sub>8</sub> O <sub>7</sub> (mL) |
|-----|-------------------------------------------------|-------------------------------------------------------------|
| 3.0 | 4.11                                            | 15.89                                                       |
| 3.2 | 4.94                                            | 15.06                                                       |
| 3.4 | 5.70                                            | 14.30                                                       |
| 3.6 | 6.44                                            | 13.56                                                       |
| 3.8 | 7.10                                            | 12.90                                                       |
| 4.0 | 7.71                                            | 12.29                                                       |
| 4.2 | 8.28                                            | 11.72                                                       |
| 4.4 | 8.82                                            | 11.18                                                       |
| 4.6 | 9.35                                            | 10.65                                                       |
| 4.8 | 9.86                                            | 10.14                                                       |
| 5.0 | 10.30                                           | 9.70                                                        |
| 5.2 | 8.28                                            | 11.72                                                       |
| 5.4 | 8.82                                            | 11.18                                                       |
| 5.6 | 9.35                                            | 10.65                                                       |
| 5.8 | 9.86                                            | 10.14                                                       |
| 6.0 | 12.63                                           | 7.37                                                        |
| 6.2 | 13.22                                           | 6.78                                                        |
| 6.4 | 13.85                                           | 6.15                                                        |
| 6.6 | 14.55                                           | 5.45                                                        |
| 6.8 | 15.45                                           | 4.55                                                        |
| 7.0 | 16.47                                           | 3.53                                                        |
| 7.2 | 17.39                                           | 2.61                                                        |
| 7.4 | 18.17                                           | 1.83                                                        |
| 7.6 | 18.73                                           | 1.27                                                        |
| 7.8 | 19.15                                           | 0.85                                                        |
| 8.0 | 19.45                                           | 0.55                                                        |

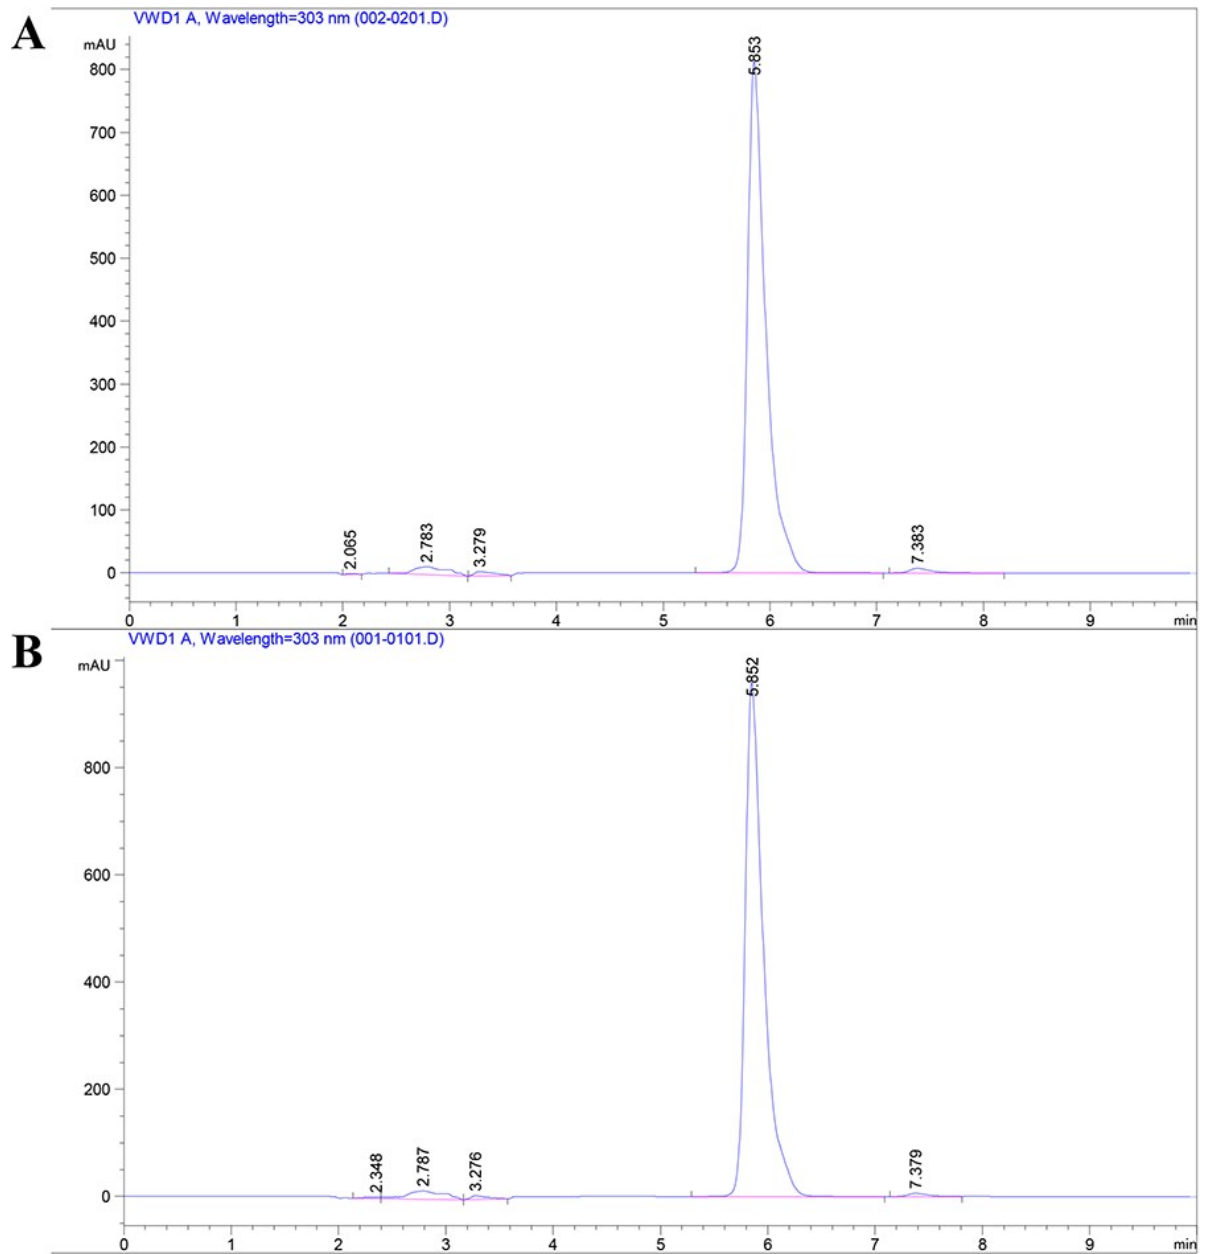

**Fig. S1** The original copies of HPLC  
(A) HPLC of product resveratrol (B) HPLC of resveratrol standard

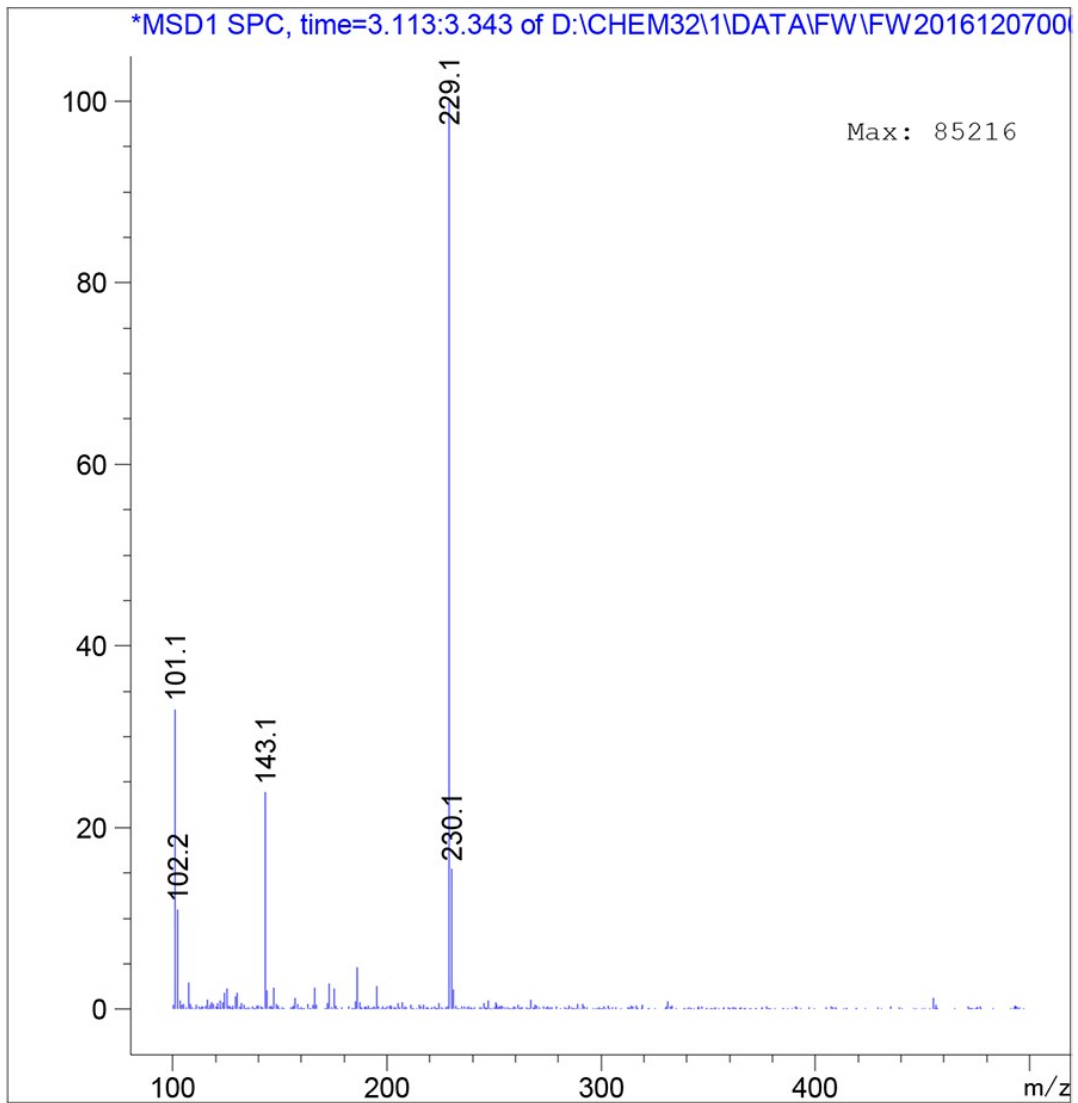

Fig. S2 The original copies of MS

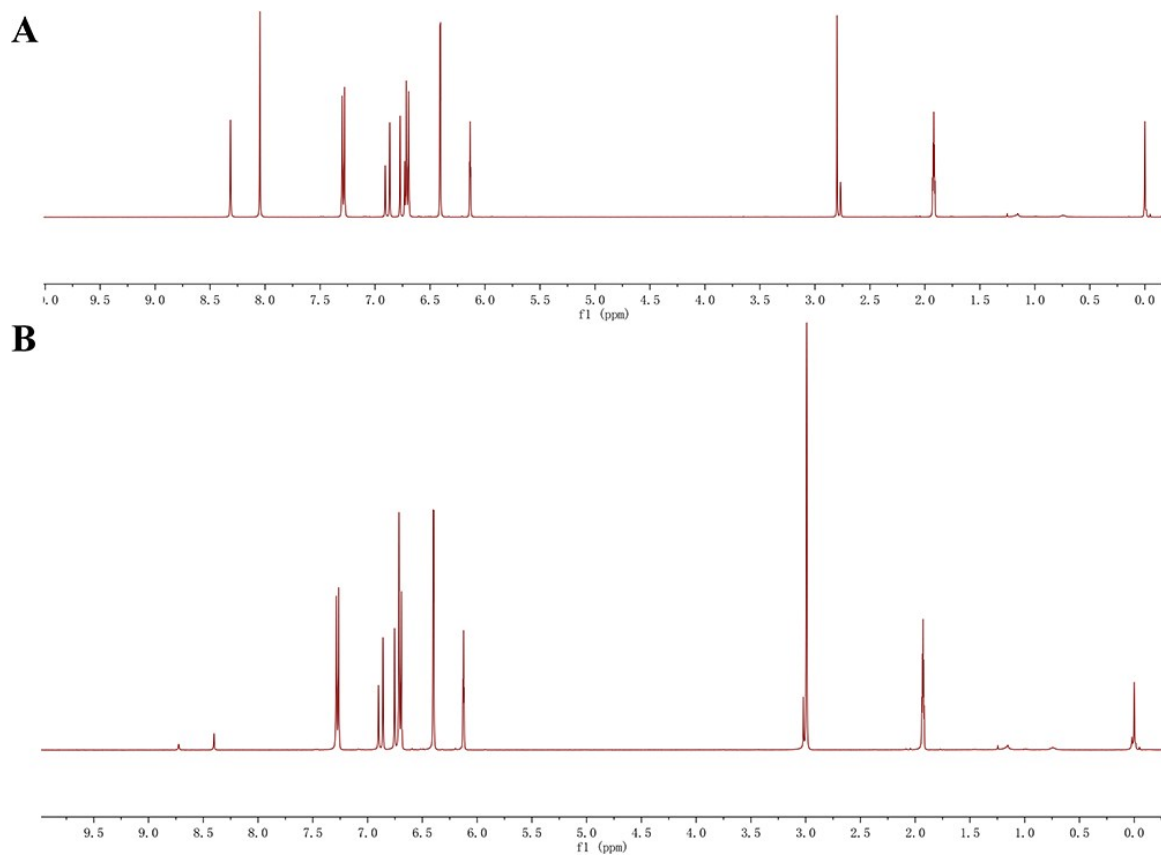

**Fig. S3** The original copies of  $^1\text{H-NMR}$   
(A)  $^1\text{H-NMR}$  of resveratrol in Acetone-D6 (B)  $^1\text{H-NMR}$  of resveratrol in Acetone-D6 adding  $\text{D}_2\text{O}$
